# Supplementary material
Source: bioRxiv or medRxiv preprint supplement (https://www.biorxiv.org/highwire/filestream/101088/field_highwire_adjunct_files/3/324509-12.pdf)
Supplement: Supplementary file [file 324509-12.pdf]

**Supplementary Table 4.** Summary of obtained sequences

| ID  | CD4+ Tested |          | Q <sup>2</sup> VOA Sequences |     | % in clones |      | # of Sequences |     | % identical between NFL and Q <sup>2</sup> VOA |
|-----|-------------|----------|------------------------------|-----|-------------|------|----------------|-----|------------------------------------------------|
|     | W-2         | W23      | W-2                          | W23 | W-2         | W23  | Rebound        | NFL |                                                |
| 601 | 1.80E+08    | 1.98E+08 | 46                           | 44  | 34.0        | 68.2 | 52             | NT  | NT                                             |
| 602 | 2.09E+08    | 2.66E+08 | 53                           | 66  | 47.9        | 81.7 | 31             | 9   | 33.3                                           |
| 603 | 2.40E+07    | 1.44E+07 | 24                           | 29  | 62.5        | 65.5 | 31             | 28  | 82.1                                           |
| 605 | 1.01E+08    | 1.73E+08 | 48                           | 45  | 58.3        | 72.7 | 10             | NT  | NT                                             |
| 608 | 2.64E+07    | 5.52E+07 | 24                           | 22  | 0.0         | 9.1  | 23             | NT  | NT                                             |
| 609 | 1.80E+08    | NT       | 26                           | NT  | 19.2        | NT   | 12             | NT  | NT                                             |
| 610 | 7.92E+07    | 9.84E+07 | 51                           | 38  | 94.1        | 71.1 | 19             | 19  | 47.3                                           |
| 611 | 1.50E+08    | 4.32E+07 | 39                           | 31  | 30.8        | 48.4 | 27             | 21  | 33.3                                           |
| 613 | 8.18E+07    | 2.88E+07 | 56                           | 48  | 80.4        | 87.5 | 12             | 23  | 8.6                                            |
| 616 | 4.32E+07    | 9.60E+06 | 35                           | 43  | 80.0        | 71.4 | NT             | 33  | 87.8                                           |

NT - Not tested; NFL - Near full-length
